1 Bayesian Analysis of High Throughput Data

2 Eric J. Ma (Department of Biological Engineering, MIT)  
3 Islam T. M. Hussein (Department of Biological Engineering, MIT)  
4 Vivian J. Zhong (Department of Biological Engineering, MIT)  
5 Christopher Bandoro (Microbiology Program, MIT)  
6 Jonathan A. Runstadler (Department of Biological Engineering, MIT)  
7

8 **Contents**

|    |                                                           |          |
|----|-----------------------------------------------------------|----------|
| 9  | <b>Abstract</b>                                           | <b>1</b> |
| 10 | <b>Introduction</b>                                       | <b>2</b> |
| 11 | <b>Results</b>                                            | <b>2</b> |
| 12 | Statistically Defensible Replicate Measurements . . . . . | 2        |
| 13 | Representation of Uncertainty . . . . .                   | 4        |
| 14 | Posterior Densities of Assay Parameters . . . . .         | 5        |
| 15 | <b>Discussion</b>                                         | <b>7</b> |
| 16 | <b>Materials and Methods</b>                              | <b>7</b> |
| 17 | Code & Data . . . . .                                     | 7        |
| 18 | <b>References</b>                                         | <b>8</b> |

19 **Abstract**

20 Duplicate or triplicate experimental replicates are commonplace in the high  
21 throughput literature. However, it has not been tested whether this is statistically  
22 defensible or not. To address this issue, we use probabilistic programming to  
23 develop a simple hierarchical model for analyzing high throughput measurement  
24 data. With the model and simulated data, we show that a small increase in  
25 replicate experiments can quantitatively improve accuracy in measurement. We  
26 also provide posterior densities for statistical parameters used in the evaluation  
27 of HT data. Finally, we provide an extensible open source implementation that

28 ingests data structured in a simple format and produces posterior densities of  
29 estimated measurement and assay evaluation parameters.

## 30 **Introduction**

31 High throughput (HT) screening experiments are necessary for systematically  
32 interrogating biology. However, there are a number of statistical issues that are  
33 widespread in the HT screening literature. Firstly, triplicate (or worse, duplicate)  
34 measurements are commonplace, with little statistical justification; conceivably,  
35 this is mostly cost driven, a practical reason but nonetheless detrimental for  
36 scientific accuracy. Secondly, t-tests with multiple hypothesis correction serves as  
37 the main vehicle for statistical analysis of HT data, potentially falsely identifying  
38 samples as negatives or non-hits. Thirdly, standard error of the mean (SEM)  
39 are commonly used as the reported error bars, not only in the HT literature  
40 but also in non-HT publications (Kemnitzer et al. 2005; Marion et al. 2009;  
41 Le Hellard et al. 2002; Fu et al. 2014), and this under-represents the variation  
42 in the data. Finally, statistical parameters for assay evaluation are computed  
43 without acknowledging the uncertainty that may arise because of uncertainty in  
44 the data.

45 To address these problems, take an empirical approach. We use probabilistic  
46 programming to develop a simple Bayesian hierarchical model of a ‘generic’ HT  
47 assay (Figure 1, Supplementary Materials). Using this model, we are able to  
48 simultaneously provide Bayesian posterior distributions of measurement and  
49 statistical evaluation parameters. We show, using simulation studies, that  
50 increasing the number of replicates by one or two measurements can drastically  
51 reduce measurement inaccuracy. Using both simulation and real data, we  
52 show that the common practice of reporting mean  $\pm$  SEM under-represents  
53 the uncertainty in measurement variation. We argue that the uncertainty in  
54 statistical assessment parameters can help guide more rational decision-making.  
55 Finally, we provide an extensible open source tool for the analysis of such data.

## 56 **Results**

### 57 **Statistically Defensible Replicate Measurements**

58 In order to investigate how the number of replicates affected the accuracy, we  
59 simulated experimental runs of 100 samples with varying numbers replicate  
60 measurements ( $n=2$  to  $n=20$ ). For each  $n$ , 20 experimental runs were simulated.

61 As shown in Figure 2, the baseline accuracy rate with duplicate ( $n=2$ ) measure-  
62 ments, as measured by fraction of actual values inside the posterior density’s  
63 95% HPD, falls around the 70-75% range. This means that about 25% of the

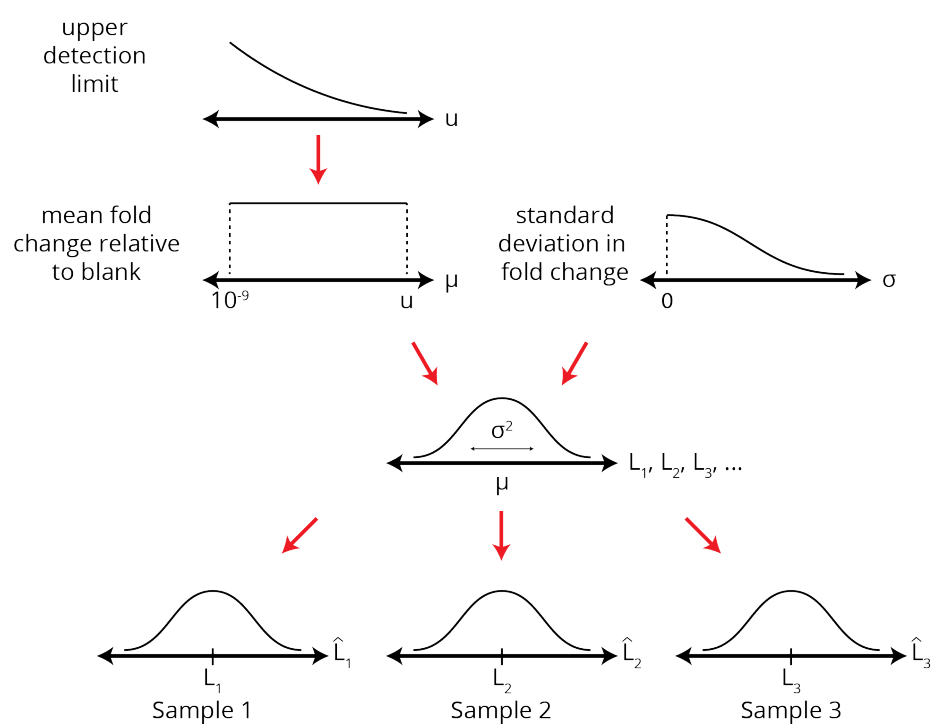

Figure 1: Bayesian hierarchical model.

64 final posterior 95% HPDs do not encompass the actual value. By contrast, by  
65 using  $n=5$  replicates, the accurate HPD fraction falls around the 85-90% range.  
66 Roughly doubling the number of samples decreases the inaccurate fraction by up  
67 to 3-fold. Following the law of diminishing marginal returns, additional accuracy  
68 can be gained, but at a cost of increasing sample sizes.

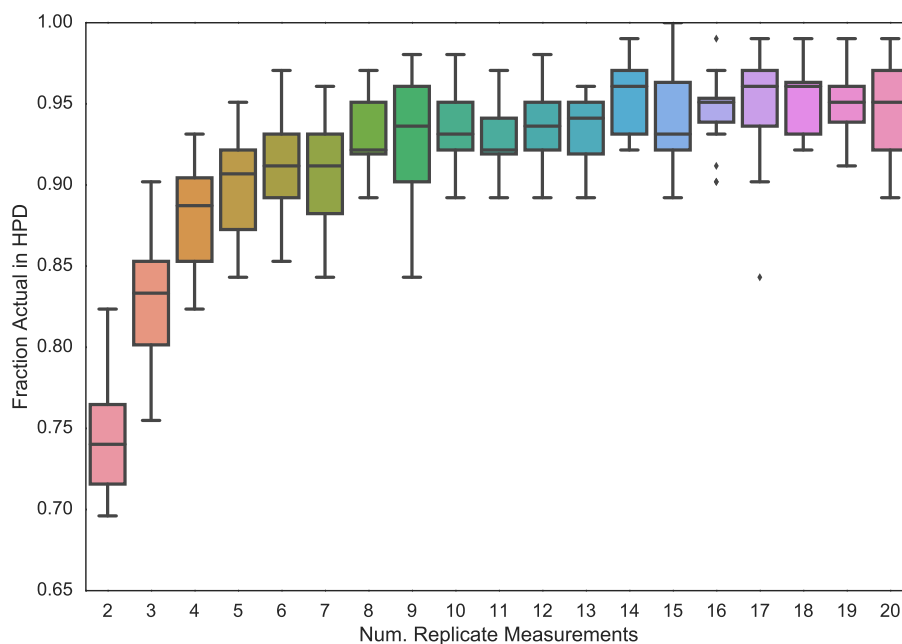

Figure 2: Accuracy of 95% HPD as a function of number of replicate samples taken.

## 69 Representation of Uncertainty

70 Statistical software (e.g. GraphPad Prism) make it easy for researchers to  
71 visualize and compute frequentist confidence intervals and error bars. However,  
72 as a result of their ease of use, it is also easy to make statistical errors such as  
73 reporting error bars using the standard error of the mean (SEM), rather than  
74 95% confidence/credible intervals. Our analysis of simulation and experimental  
75 data show clearly what can be inferred from the mathematical form but is often  
76 ignored: that the SEM grossly under-represents the uncertainty in measurement  
77 and data variation compared to 95% confidence intervals and Bayesian 95%  
78 credible intervals (Figure 3). As such, it would be poor statistical practice to  
79 report SEM, and 95% credible/confidence intervals would be much preferable.

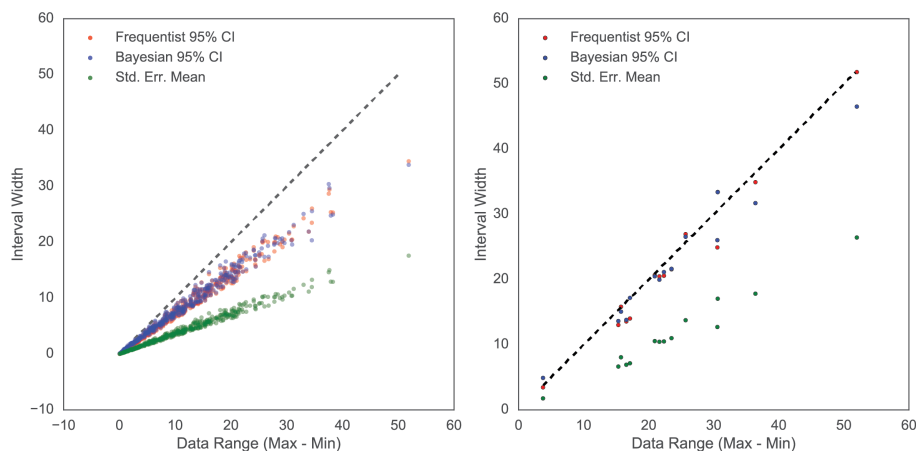

Figure 3: Bayesian 95% credible interval, Frequentist 95% confidence interval, and SEM interval widths as compared to the actual data range. (left) Simulated data. (right) Experimental measurement data measuring the influence of heat-killed bacteria on influenza activity.

## 80 Posterior Densities of Assay Parameters

81 Statistical parameters, such as the Z-factor, have been developed to evaluate  
82 the quality of HT assay data (J. Zhang, Chung, and Oldenburg 1999; Sui and  
83 Wu 2007). By taking a Bayesian view, we can compute not just the expected  
84 parameter values but also their posterior distributions (Figure 4). As such, given  
85 the uncertainty surrounding the measurements, the original 3-class system for  
86 classifying the quality of an hit can be extended to 5 classes (Figure 4).

87 The actionable consequences of these Z-value distributions depends on the exper-  
88 imental context. There may be scenarios where downstream experimentation is  
89 expensive, and only “true hits” should be tested; in this case, the “probable large  
90 separation” samples may be chosen for exclusion, helping to reduce costs. On the  
91 other hand, if downstream experimentation is cheap, and it is desirable to have  
92 a large set of samples to be processed further, then samples in the “probable  
93 small separation” may be included in downstream testing, helping to reduce  
94 false negatives. The truism remains: statistics does not replace human judgment  
95 of the value of a sample, but can serve as a valuable tool in the decision-making  
96 process.

97 We note that Z-factors are not the only statistical parameters that can be  
98 computed. Other deterministically calculated parameters, such as effect sizes,  
99 can be computed in a similar fashion, likewise yielding uncertainty estimates,  
100 given the data.

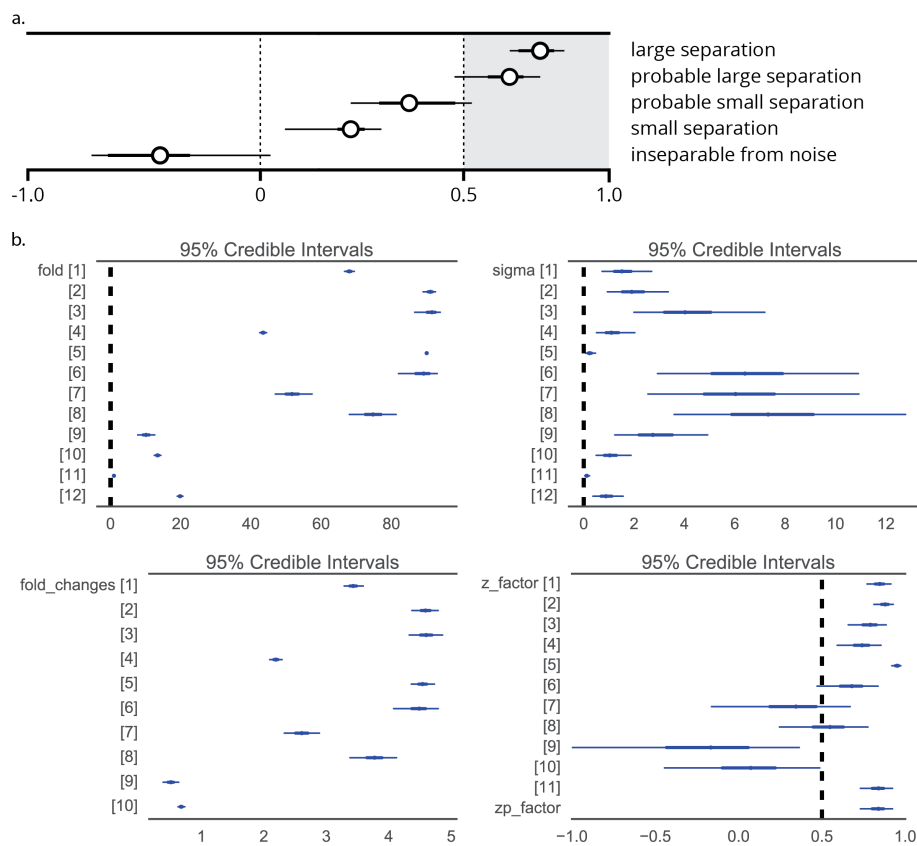

Figure 4: Z-score classes and simulation data. Circle/dot: HPD mean. Thick lines: HPD inter-quartile range. Thin lines: 95% HPD range. (a) Five Z-score classes based on the Z-score posterior density. (b) Forest plot of posterior distributions from one simulation run. Samples 11 and 12 (respectively) are the blank and the non-extreme positive control in this simulated experiment. (top-left) Posterior density in fold change relative to blank. (top-right) Posterior density of variance. (bottom-left) Deterministic posterior density of fold change relative to positive control. (bottom-right) Deterministic posterior density of Z-factor computed using the non-extreme positive control as the baseline.

## 101 Discussion

102 It is well-known that Bayesian analysis allows the uncertainty in parameter  
103 estimates to be explicitly modelled, with credibility (probability density) assigned  
104 to parameter estimate intervals. The provision of uncertainty can clarify close-  
105 to-call situations (e.g. Z-factors close to 0.5) and uncover potential false positives  
106 (e.g. large Z-factors close to 1.0 but with high variance), enabling better decision-  
107 making under uncertainty. Other merits and caveats of Bayesian analysis have  
108 been treated extensively in the literature as well (Kruschke 2013; Lin et al. 1999),  
109 and we do not go further into them here.

110 Probabilistic programming approaches make Bayesian methods much more  
111 accessible than analytical methods (Salvatier, Wiecki, and Fonnesbeck 2015).  
112 By leveraging these tools, we are in turn able to make Bayesian methods  
113 more generally accessible for the generic researcher working in high throughput  
114 measurement. In aid of reproducible science, we have also released an open  
115 source command-line program available for analysis of this type of data (#cite:  
116 Zenodo).

117 A key issue that has cropped up over the past half decade is the scientific  
118 “reproducibility crisis”, partly due to erroneous researcher reliance on p-values as  
119 a judgement device for “significance” (Wasserstein and Lazar 2016). Judgements  
120 of what “hits” to continue with downstream processing often relies on a calculated  
121 p-value rather than effect sizes; statistical significance has come to replace  
122 biological significance (Nuzzo 2014; Baker 2016). In light of this, we argue that  
123 by taking a Bayesian view of the data, we may replace p-value-based judgement  
124 calls with ones based on the distribution and uncertainty in estimated quality  
125 evaluation parameters (e.g. Z-factors & effect sizes), hence improving the quality  
126 of published results in the scientific literature.

## 127 Materials and Methods

### 128 Code & Data

129 All code for simulation and analysis are available as Python scripts and Jupyter  
130 notebooks. The archived version used in this publication is released on Zen-  
131 odo (#TODO), while the source code and data (including that used for this  
132 manuscript) can be found on GitHub.

## 133 References

- 134 Baker, Monya. 2016. "Statisticians issue warning over misuse of P values."  
135 *Nature* 531 (7593): 151–51.
- 136 Fu, Yanfang, Jeffrey D Sander, Deepak Reyon, Vincent M Cascio, and J Keith  
137 Joung. 2014. "Improving CRISPR-Cas nuclease specificity using truncated guide  
138 RNAs." *Nature Biotechnology* 32 (3): 279–84.
- 139 Kemnitzer, W, S Kasibhatla, S C Jiang, H Zhang, J H Zhao, S J Jia, L F Xu,  
140 et al. 2005. "Discovery of 4-aryl-4H-chromenes as a new series of apoptosis  
141 inducers using a cell- and caspase-based high-throughput screening assay. 2.  
142 Structure-activity relationships of the 7- and 5-, 6-, 8-positions." *Bioorganic &*  
143 *Medicinal Chemistry Letters* 15 (21): 4745–51.
- 144 Kruschke, John K. 2013. "Bayesian estimation supersedes the t test." *Journal*  
145 *of Experimental Psychology. General* 142 (2): 573–603.
- 146 Le Hellard, S, S J Ballereau, P M Visscher, H S Torrance, J Pinson, S W Morris,  
147 M L Thomson, et al. 2002. "SNP genotyping on pooled DNAs: comparison  
148 of genotyping technologies and a semi automated method for data storage and  
149 analysis." *Nucleic Acids Research* 30 (15): –e74.
- 150 Lin, C, A Gelman, P N Price, and D H Krantz. 1999. "Analysis of local  
151 decisions using hierarchical modeling, applied to home radon measurement and  
152 remediation." *Statistical Science*.
- 153 Marion, Rosa M, Katerina Strati, Han Li, Matilde Murga, Raquel Blanco,  
154 Sagrario Ortega, Oscar Fernandez-Capetillo, Manuel Serrano, and Maria A  
155 Blasco. 2009. "A p53-mediated DNA damage response limits reprogramming to  
156 ensure iPS cell genomic integrity." *Nature* 460 (7259): 1149–U119.
- 157 Nuzzo, Regina. 2014. "Scientific method: statistical errors." *Nature.com* 506  
158 (7487): 150–52.
- 159 Salvatier, John, Thomas Wiecki, and Christopher Fonnesbeck. 2015. "Proba-  
160 bilistic Programming in Python using PyMC." *PeerJ Computer Science*, no. 2  
161 (July): e55. <http://arxiv.org/abs/1507.08050>.
- 162 Sui, Yunxia, and Zhijin Wu. 2007. "Alternative statistical parameter for  
163 high-throughput screening assay quality assessment." *Journal of Biomolecular*  
164 *Screening* 12 (2): 229–34.
- 165 Wasserstein, Ronald L, and Nicole A Lazar. 2016. "The ASA's Statement on  
166 p-Values: Context, Process, and Purpose." *The American Statistician* 70 (2):  
167 129–33.
- 168 Zhang, JH, TD Chung, and KR Oldenburg. 1999. "A Simple Statistical  
169 Parameter for Use in Evaluation and Validation of High Throughput Screening  
170 Assays." *Journal of Biomolecular Screening* 4 (2): 67–73.
